# Supplementary material for: Enhancing capacitance of supercapacitor with both organic electrolyte and ionic liquid electrolyte on a biomass-derived carbon
Source: Royal Society of Chemistry journal article supplement (doi:10.1039/c7ra01630a), 2017-01-01
Supplement: c7ra01630a1.pdf [file c7ra01630a1.pdf]

## Supporting information

### Enhancing capacitance of supercapacitor with both organic electrolyte and ionic liquid on a biomass-derived carbon

Xuehang Wang, Yahao Li, Fengliu Lou, Marthe Emelie Melandsø Buan, Edel Sheridan, and De Chen\*

**Table S1** capacitance vs current density/scan rate calculated based on both GCD curve and CV curve

| APN-IMPREG-HCl |             | Capacitance (F/g)                      |     |     |     |     |     |     |   |   |     |
|----------------|-------------|----------------------------------------|-----|-----|-----|-----|-----|-----|---|---|-----|
| Method         | electrolyte | Current density (A/g)/Scan rate (mV/s) |     |     |     |     |     |     |   |   |     |
|                |             | 1                                      | 2   | 3   | 4   | 5   | 6   | 7   | 8 | 9 | 10  |
| GCD*           | TEABF4/AN   | 133                                    | 141 |     | 137 | 135 |     | 129 |   |   | 130 |
|                | EMIMBF4     | 185                                    | 166 | 160 | 153 |     |     | 149 |   |   |     |
| CV**           |             | 50                                     | 100 | 200 | 300 | 500 |     |     |   |   |     |
|                | TEABF4/AN   | 129                                    | 129 | 123 | 119 | 114 | 110 |     |   |   |     |
|                | EMIMBF4     | 174                                    | 176 | 153 | 138 | 123 | 100 |     |   |   |     |
| APN-IMPREG     |             | Current density (A/g)                  |     |     |     |     |     |     |   |   |     |
| Method         | electrolyte | 1                                      | 2   | 3   | 4   | 5   | 6   | 7   | 8 | 9 | 10  |
| GCD            | TEABF4/AN   | 105                                    | 105 | 104 | 109 | 106 | 104 |     |   |   | 104 |
|                | EMIMBF4     | 141                                    | 110 |     | 90  |     |     | 75  |   |   |     |
| APN-KOH        |             | Current density (A/g)                  |     |     |     |     |     |     |   |   |     |
| Method         | electrolyte | 1                                      | 2   | 3   | 4   | 5   | 6   | 7   | 8 | 9 | 10  |
| GCD            | TEABF4/AN   | 65                                     |     | 67  |     | 66  |     | 64  |   |   | 63  |
|                | EMIMBF4     | 130                                    | 81  | 73  |     | 71  | 69  | 68  |   |   |     |

\* GCD: The capacitance retention at current density of 10 A/g is 97% of the capacitance at 1 A/g for organic electrolyte, and 81 % (7A/g vs. 1A/g) in neat IL electrolyte.

\*\* CV: The capacitance retention at current density of 500 mV/s is 77% of the capacitance at 1 A/g for organic electrolyte, and 57 % (7A/g vs. 1A/g) in neat IL electrolyte. The rate capability based on CV is worse than the one calculated based GCD, as the voltage drop is taken into consideration when calculating the capacitance using GCD curve. The exact voltage drop is reported in Figure 2b and 2e.

**Table S2** Comparison of properties of carbon materials synthesized from plant and their use in SCs

| Material      | Activating Agent                                | BET Surface Area (m <sup>2</sup> /g) | Electrolyte                                           | Capacitance (F/g) (recording conditions) | Operating Voltage Window (V) | Maximum Energy (Wh/kg) | Ref.           |
|---------------|-------------------------------------------------|--------------------------------------|-------------------------------------------------------|------------------------------------------|------------------------------|------------------------|----------------|
| Dead leave    | no                                              | 1230                                 | Organic                                               | 0.5A/g                                   | 2.5                          | 28                     | <sup>1</sup>   |
| peanut shell  | ZnCl <sub>2</sub>                               | 1552                                 | 1M TEABF <sub>4</sub> /PC                             | 106 (50mA/g)                             | 2.5                          | 26.6                   | <sup>2</sup>   |
| rice husk     | ZnCl <sub>2</sub>                               | 1527                                 | 1M TEABF <sub>4</sub> /PC                             | 94 (50mA/g)                              | 2.5                          | 23.4                   | <sup>2</sup>   |
| seaweeds      | no                                              | 1307                                 | 1M TEABF <sub>4</sub> /AN                             | 94 (2mV/s)                               | 2.3                          | 17.5                   | <sup>3</sup>   |
| Coconut shell | KOH                                             | 1500-1600                            | 1M TEABF <sub>4</sub> /AN<br>neat EMIMBF <sub>4</sub> | 118/127<br>(N/A)                         | 2.7/3.5                      | 29/54                  | <sup>4</sup>   |
| Commercial AC | no                                              | ~1500                                | 1M TEABF <sub>4</sub> /AN                             | 80-120 (N/A)                             | 2.5-2.7                      |                        | <sup>5</sup>   |
| pollen        | KOH                                             | 3037                                 | 1M TEABF <sub>4</sub> /AN<br>neat EMIMBF <sub>4</sub> | 185/207<br>(1A/g)                        | 2.7/3.5                      | 46/88                  | <sup>6</sup>   |
| Pine tree     | KOH                                             | 1018                                 | 1M TEABF <sub>4</sub> /AN<br>neat EMIMBF <sub>4</sub> | 77/130<br>(1A/g)                         | 2.5/4                        | 18/46                  | APN-KOH        |
| Pine tree     | H <sub>3</sub> PO <sub>4</sub> +NH <sub>3</sub> | 2029                                 | 1M TEABF <sub>4</sub> /AN<br>neat EMIMBF <sub>4</sub> | 105/140<br>(1A/g)                        | 2.5/4                        | 21/47                  | APN-IMPREG     |
| Pine tree     | H <sub>3</sub> PO <sub>4</sub> +NH <sub>3</sub> | 2207                                 | 1M TEABF <sub>4</sub> /AN<br>neat EMIMBF <sub>4</sub> | 134/184<br>(1A/g)                        | 2.5/4                        | 26/92                  | APN-IMPREG-HCl |

Model used in this work

The original model deviation is reported in our previous work<sup>7</sup>, We summary the capacitance estimation process.

Firstly, the cumulative pore volume curve of the material derived from the N<sub>2</sub>-isotherm is converted based on:

$$l(D_i) = \frac{4[V_C(D_i) - V_C(D_{i-1})]}{\pi(D_i)^2} \quad (i = 1, 2, 3, \dots n, \text{ and } D_0 = d_{\text{ion}})$$

where  $V_C$  is the cumulative pore volume. Thus,  $l(D_i)$  represents the pore lengths for the pores with same pore diameter (as  $D_i$  is very close to  $D_{i-1}$ ). In this work, the  $d_{\text{ion}}=0.95$  nm based on the size of EMIM<sup>+</sup>.

The number of adsorbed ions  $N$  in the pore with pore size  $D$  and pore length  $l$  can be solved as:

$$N = \frac{3D^2 \cdot l \cdot \varphi}{16d_{\text{ion}}^3}$$

Here  $\varphi$  is the volume fraction ( $\varphi$  = the total volume of the adsorbed ions/the volume of the pore) and  $d_{\text{ion}}$  is the effective ion size for IL. The deviation of the volume fraction is based on the geometrically close packing structure of the spherical ions inside the cylindrical pores.<sup>7-10</sup>

The number of ions adsorbed on the total surface area of the porous material (or  $N_{\text{total}}$ ) can be calculated by summing up the number of ions stored in all the ion-accessible pores ( $D_1$  to  $D_i$  from the PSD) on the sample:

$$N_{\text{total}} = \sum_{d_{\text{ion}}}^{D_i} N(D_i, d_{\text{ion}}) \quad (i = 1, 2, 3, 4 \dots \text{ and } D_0 = d_{\text{ion}})$$

As the discharge curve at room temperature is very close to linear, the estimated gravimetric capacitance of a single electrode can be expressed as:

$$C'_{sp, electrode} = \frac{Q}{U} = \frac{2e \cdot N_{\text{total}}}{U}$$

where  $Q$  is the total charge on the electrode,  $U$  is the potential absolute value of the single electrode, which is approximately 2 V, and  $e$  is one electron charge equals to  $1.6 \times 10^{-19}$  C.

## References

1. M. Biswal, A. Banerjee, M. Deo and S. Ogale, *Energy Environ. Sci.*, 2013, **6**, 1249-1259.
2. X. He, P. Ling, J. Qiu, M. Yu, X. Zhang, C. Yu and M. Zheng, *J. Power Sources*, 2013, **240**, 109-113.
3. E. Raymundo-Piñero, M. Cadek and F. Béguin, *Adv. Funct. Mater.*, 2009, **19**, 1032-1039.
4. L. Wei and G. Yushin, *Nano Energy*, 2012, **1**, 552-565.
5. A. Burke, *Electrochim. Acta*, 2007, **53**, 1083-1091.
6. L. Zhang, F. Zhang, X. Yang, K. Leng, Y. Huang and Y. Chen, *Small*, 2013, **9**, 1342-1347.
7. X. Wang, H. Zhou, E. Sheridan, J. C. Walmsley, D. Ren and D. Chen, *Energy & Environmental Science*, 2016, **9**, 232-239.
8. A. Mughal, H. Chan, D. Weaire and S. Hutzler, *Phys. Rev. E*, 2012, **85**, 051305.
9. M. Hodak and L. Girifalco, *Phys. Rev. B*, 2003, **67**, 075419.
10. A. Mughal, H. K. Chan and D. Weaire, *Phys. Rev. Lett.*, 2011, **106**, 115704.
